# Supplementary material for: Content Validity of Patient-Reported Measures Evaluating Experiences of the Quality of Transitions in Healthcare Settings - A Scoping Review.
Source: Research Square preprint supplement (doi:10.21203/rs.3.rs-4211885/v1), 2024-04-12
Supplement: Supplementary file 1 [file 1f50f07bbf8809eba6068e32.xlsx]

## Sheet: Ark1
	Relevant themes for measurement of patients' experience of quality of care in healthcare transitions
Patient-Reported Experience Measure (PREM)	Patient-centeredness and individualized care	Effectiveness	Efficiency, coordination, and management	Timeliness	Equity	Caring attitude and compassion	Navigation, access, and availability	Responsibility	Relational Continuity and relationship	Informational Continuity	Communication and education	Caretakers and relatives	Tangibles and Facilities (Not relevant)	Financial (Not relevant)	Articles	Included or reason for exclusion	Original development and/or evaluation articles*	*For full reference list, contact first author
	Number of items in PREM for each theme
ACSS-MH Alberta Continuity of Services Scale - Mental Health	6	3	9	2			8	4	5	2		2	1	1	Joyce 2010, Fernandes 2020, Weaver 2017	Included	Adair 2003, Adair 2005, Durbin 2004, Jensen 2014, Joyce 2004
CCAENA Questionnaire of Continuity between Care Levels	2		7	2			2		6	4	4	4			Aller 2013, Aller 2013, Vargas 2013, Karam 2019	Included
CCRQ Client-Centered Rehabilitation Questionnaire	8	4	2			2	4		1		6	4			McMurray 2016	Included	Cott 2006
CONTINU-UM Continuity of care – User Measure	5	1	3	1			4		2		1				Rose 2009, Fernandes 2020, Weaver 2017, Sweeney 2012	Included	Burns 2009, Catty 2011, Sweeney 2015
CPCI Components of Primary Care Index	3	1	3					1	6	2	2				Quinn 2017	Included	Flocke 1997
CPCQ Client Perception of Coordination Questionnaire	7	3	6	1			1	1		2	1	2	1		McGuiness 2003, Quinn 2017	Included
CQI Consumer Quality Index (Continuum of Care)		1	4	2			1		2	4					Berendsen 2009, Willems 2013, Kollen 2011	Included
CTM Care Transition Measure	3		2								10				Acosta 2017, Bakshi 2012, Coleman 2005, Shadmi 2009, Mosallam 2014, Hod 2020, Auerbach 2016	Included
DCCS Diabetes Continuity of Care Scale	7	6	4	6	3		8		5	3	4	1			Dolovich 2004	Included
ECC Experienced Continuity of Care	2	2	5	2		1			2	4	1				Gulliford 2006, Fillion 2012	Included
HCCQ Heart Continuity of Care Questionnaire	1	2	5				2	2		6	13				Hadjistavropoulos 2004, Hadjistavropoulos 2008, Kowalyk 2004, Valaker 2019, Riley 2007	Included
NCQ Nijmegen continuity of care questionnaire	3		13					2	5	6					Cohen Castel 2018, Hetlevik 2017, Uijen 2012, Fernandes 2020, Weaver 2017, Hopstaken 2021, den Herder-van der Eerden 2018	Included	Uijen 2011, Uijen 2014
P3CEQ Person centred coordinated experience questionnaire	4	2	2			1		1		1	2				Lloyd 2019, Sugavanam 2018	Included
PACIC Patient Assessment of Chronic Illness Care	10	2	2			1				2	3				Drewes 2012, Glasgow 2005, Berbee 2009, Fernandes 2020, Quinn 2017, Cramm 2013, Carryer 2014, Bower 2018	Included	Gensichen 2011
PCAS The Primary Care Assessment Survey	4	2	2			1		1		1	11				Quinn 2017, O'Malley 2009	Included	Safran 1998
PCCQ Patient Continuity of Care Questionnaire	7		6				5		6	2	12	2			Fillion 2012, Quinn 2017, Sisler 2012, Carreiro 2016	Included	Hadjistavropoulos 2008
PEICS Patient Experience of Integrated Care Scale	3	2	2				4				4	2			Joober 2018	Included
PPCMC Patient Percieved Continuity from Multiple Clinicians		1	8					2		6	6				Haggerty 2012, Quinn 2017, Tremblay 2017, Breton 2012	Included
PPIC Patient Perceptions of Integrated Care	3		6	2			1	1		6	4			1	Kiang 2013, Mohr 2019, Fryer 2016, Benzer 2019	Included
SHEP Survey of Healthcare Experiences of Patients	5		1	2		2					5		2		Black 2021, Fernandes 2020, Quinn 2017	Included	Katz 2014, Stolzman 2010, Wright 2006, Burnett-Zeigler 2011
VANCOSS Veteran Affairs National Outpatient Customer Satisfaction	7		4	7		2	7			4	8	1			Black 2021, Quinn 2017	Included	Borowsky 2002
Care Continuity Instrument															Bull 2000	< 5 domaines represented, items not available in question format
PACT-M Partners at Care Transitions Measure	4	1					1				3				Liu 2021, Oikonomou 2020	< 5 domaines represented
PCCCT Patient-centered Coordination by a Care Team questionnaire	4	2	2							2	3				Ramond-Roquin 2019	< 5 domaines represented
PREPARED and B-PREPARED Prescriptions, Ready to re-enter community, Education, Placement, Assurance of safety, Realistic expectations, Empowerment, Directed to appropriate services questionnaire	2		2								5				Hwang 2019, Andrew 2018	< 5 domains represented, wrong phenomenon of interest	Grimmer 2001
IEXPAC Chronic Patient Experience Evaluation Instrument	3	1	1								4				Mira 2016, Guilabert 2021	< 5 domains represented
QUOTE and QUOTE-IBD Quality of care through the patient's eyes	3		1	2			2				1			1	Soares 2015, Berbee 2009, McMurray 2016, Bortoli 2014	< 5 domains represented	Sixma 1998, van der Linde 2007
OPTION OPportunity for Treatment In Oncology questionnaire															Rucci 2018, Bravi 2018	< 5 domains represented, items not available in question format
